# Supplementary material for: Structured reporting has the potential to reduce reporting times of dual-energy x-ray absorptiometry exams
Source: BMC Musculoskelet Disord. 2020 Apr 16;21:248. doi: 10.1186/s12891-020-03200-w (PMC7164197; doi:10.1186/s12891-020-03200-w)
Supplement: Supplementary file 1 — Additional file 1. Reporting times for DXA exams. [file 12891_2020_3200_MOESM1_ESM.xlsx]

## Sheet: Rawdata
Patient ID	Report type (1 = FTR; 2 = SR)	Reader (RR = radiology resident; MS = medical student)	Experience in number of reports (1 = none; 2 = less than 25; 3 = 25 - 50; 4 = more than 50)	Time in sec	Type of exam (1 = first exam; 2 = follow-up exam)	Time in min
5	1	RR1	2	315	1	5.25
10	1	RR1	2	251	1	4.18333
12	1	RR1	2	267	1	4.45
15	1	RR1	2	305	1	5.08333
22	1	RR1	2	211	1	3.51667
23	1	RR1	2	195	1	3.25
7	1	RR2	3	201	1	3.35
11	1	RR2	3	287	1	4.78333
14	1	RR2	3	248	1	4.13333
16	1	RR2	3	186	1	3.1
20	1	RR2	3	171	1	2.85
25	1	RR2	3	166	1	2.76667
7	2	RR1	2	120	1	2
11	2	RR1	2	169	1	2.81667
14	2	RR1	2	127	1	2.11667
16	2	RR1	2	164	1	2.73333
20	2	RR1	2	126	1	2.1
25	2	RR1	2	165	1	2.75
5	2	RR2	3	171	1	2.85
10	2	RR2	3	146	1	2.43333
12	2	RR2	3	120	1	2
15	2	RR2	3	134	1	2.23333
22	2	RR2	3	118	1	1.96667
23	2	RR2	3	116	1	1.93333
1	1	RR1	2	447	2	7.45
3	1	RR1	2	290	2	4.83333
13	1	RR1	2	400	2	6.66667
17	1	RR1	2	320	2	5.33333
19	1	RR1	2	433	2	7.21667
21	1	RR1	2	355	2	5.91667
24	1	RR1	2	268	2	4.46667
2	1	RR2	3	356	2	5.93333
4	1	RR2	3	362	2	6.03333
6	1	RR2	3	378	2	6.3
8	1	RR2	3	408	2	6.8
9	1	RR2	3	400	2	6.66667
18	1	RR2	3	366	2	6.1
26	1	RR2	3	271	2	4.51667
2	2	RR1	2	214	2	3.56667
4	2	RR1	2	182	2	3.03333
6	2	RR1	2	175	2	2.91667
8	2	RR1	2	157	2	2.61667
9	2	RR1	2	174	2	2.9
18	2	RR1	2	315	2	5.25
26	2	RR1	2	164	2	2.73333
1	2	RR2	3	130	2	2.16667
3	2	RR2	3	188	2	3.13333
13	2	RR2	3	190	2	3.16667
17	2	RR2	3	161	2	2.68333
19	2	RR2	3	147	2	2.45
21	2	RR2	3	168	2	2.8
24	2	RR2	3	142	2	2.36667
5	1	MS1	1	415	1	6.91667
10	1	MS1	1	458	1	7.63333
12	1	MS1	1	445	1	7.41667
15	1	MS1	1	391	1	6.51667
22	1	MS1	1	319	1	5.31667
23	1	MS1	1	311	1	5.18333
7	1	MS2	1	339	1	5.65
11	1	MS2	1	377	1	6.28333
14	1	MS2	1	332	1	5.53333
16	1	MS2	1	399	1	6.65
20	1	MS2	1	359	1	5.98333
25	1	MS2	1	267	1	4.45
7	2	MS1	1	140	1	2.33333
11	2	MS1	1	135	1	2.25
14	2	MS1	1	140	1	2.33333
16	2	MS1	1	107	1	1.78333
20	2	MS1	1	142	1	2.36667
25	2	MS1	1	111	1	1.85
5	2	MS2	1	141	1	2.35
10	2	MS2	1	148	1	2.46667
12	2	MS2	1	263	1	4.38333
15	2	MS2	1	143	1	2.38333
22	2	MS2	1	138	1	2.3
23	2	MS2	1	114	1	1.9
1	1	MS1	1	714	2	11.9
3	1	MS1	1	648	2	10.8
13	1	MS1	1	522	2	8.7
17	1	MS1	1	531	2	8.85
19	1	MS1	1	525	2	8.75
21	1	MS1	1	442	2	7.36667
24	1	MS1	1	353	2	5.88333
2	1	MS2	1	657	2	10.95
4	1	MS2	1	689	2	11.4833
6	1	MS2	1	678	2	11.3
8	1	MS2	1	636	2	10.6
9	1	MS2	1	675	2	11.25
18	1	MS2	1	556	2	9.26667
26	1	MS2	1	485	2	8.08333
2	2	MS1	1	363	2	6.05
4	2	MS1	1	213	2	3.55
6	2	MS1	1	201	2	3.35
8	2	MS1	1	176	2	2.93333
9	2	MS1	1	137	2	2.28333
18	2	MS1	1	180	2	3
26	2	MS1	1	145	2	2.41667
1	2	MS2	1	443	2	7.38333
3	2	MS2	1	252	2	4.2
13	2	MS2	1	173	2	2.88333
17	2	MS2	1	197	2	3.28333
19	2	MS2	1	211	2	3.51667
21	2	MS2	1	196	2	3.26667
24	2	MS2	1	212	2	3.53333
